# Supplementary material for: Capturing the dynamics of response variability in the brain in ADHD
Source: PubMed Central journal article supplement — Neuroimage Clin. 2014 Dec 1;7:132–41. doi: 10.1016/j.nicl.2014.11.014 (PMC4299975; doi:10.1016/j.nicl.2014.11.014), 2014-12-01
Supplement: mmc1.pdf [file mmc1.pdf]

|                             | Pearson correlation with age for controls (n=20) | Pearson correlation with age for ADHD (n=20) |
|-----------------------------|--------------------------------------------------|----------------------------------------------|
| <b>mRT go trials</b>        | -0.54 (p<.01) *                                  | -0.59 (p<0.004) *                            |
| <b>sdRT go trials</b>       | -0.47 (p<.03) *                                  | -0.26 (p<.28)                                |
| <b>ICV</b>                  | -0.46 (p<.04) *                                  | -0.15 (p<.52)                                |
| <b>mu</b>                   | -0.25 (p<.29)                                    | -0.58 (p<0.007) *                            |
| <b>sigma</b>                | -0.45 (p<0.047) *                                | -0.5 (p<0.025) *                             |
| <b>tau</b>                  | -0.55 (p<0.013) *                                | -0.14 (p<.56)                                |
| <b>accuracy no-go total</b> | .23 (p<.34)                                      | .25 (p<.28)                                  |
| <b>accuracy no-go 1</b>     | .2 (p<.41)                                       | -0.22 (p<.36)                                |
| <b>accuracy no-go 3</b>     | -0.05 (p<.85)                                    | -0.17 (p<.47)                                |
| <b>accuracy no-go 5</b>     | .53 (p<.016) *                                   | .5 (p<.025) *                                |

**Table S1: Correlations between age and task performance for subjects with ADHD and controls. Significant correlations (P<0.05) are indicated with an asterisk (\*).**
